# Supplementary material for: Developing an Intelligent Data Analysis Approach for Marine Sediments
Source: MDPI journal article supplement (doi:10.3390/molecules27196539), 2022-10-03
Supplement: s1 [file s1]

### Supplementary Materials:

## Developing an intelligent data analysis approach for marine sediments

Miroslava Nedyalkova <sup>1</sup> and Vasil Simeonov <sup>2, \*</sup>

<sup>1</sup> Department of Inorganic Chemistry, Faculty of Chemistry and Pharmacy, University of Sofia “St. Kl.

Ohridski”, 1164 Sofia, Bulgaria

<sup>2</sup> Department of Analytical Chemistry, Faculty of Chemistry and Pharmacy, University of Sofia “St. Kl.

Ohridski”, 1164 Sofia, Bulgaria

\* Correspondence vsimeonov@chem.uni-sofia.bg.

Table S1. Factor loadings

| Factor Loadings (Varimax normalized) Extraction: Principal components (Marked loadings are significant) |          |              |          |              |
|---------------------------------------------------------------------------------------------------------|----------|--------------|----------|--------------|
| Variables                                                                                               | Factor 1 | Factor 2     | Factor 3 | Factor 4     |
| Humidity                                                                                                | 0.025    | <b>0.483</b> | -0.234   | <b>0.453</b> |
| Loss on ignition                                                                                        | 0.322    | <b>0.635</b> | 0.091    | -0.425       |
| N-tot                                                                                                   | 0.072    | 0.160        | -0.130   | <b>0.561</b> |
| P-tot                                                                                                   | 0.118    | <b>0.634</b> | 0.143    | 0.029        |
| Cr -lab.                                                                                                | 0.095    | <b>0.916</b> | -0.020   | -0.155       |
| Zn-lab.                                                                                                 | 0.340    | <b>0.828</b> | 0.053    | -0.104       |
| Cu-lab.                                                                                                 | 0.163    | <b>0.883</b> | -0.098   | -0.162       |
| Ni-lab.                                                                                                 | 0.194    | <b>0.920</b> | -0.064   | -0.174       |
| Pb- lab.                                                                                                | 0.491    | <b>0.787</b> | -0.031   | -0.024       |
| As-tot                                                                                                  | 0.026    | <b>0.709</b> | 0.002    | 0.206        |
| Cr-tot                                                                                                  | 0.234    | <b>0.933</b> | -0.110   | -0.048       |
| Zn-tot                                                                                                  | 0.203    | <b>0.805</b> | -0.066   | -0.048       |
| Cu-tot                                                                                                  | 0.056    | <b>0.892</b> | -0.042   | 0.024        |

|                          |              |              |              |        |
|--------------------------|--------------|--------------|--------------|--------|
| Ni-tot                   | 0.093        | <b>0.810</b> | -0.103       | 0.035  |
| Pb-tot                   | 0.383        | <b>0.832</b> | -0.062       | 0.091  |
| Naphthalene              | 0.074        | 0.066        | 0.382        | 0.598  |
| Acenaphthylene           | <b>0.690</b> | 0.030        | 0.010        | 0.332  |
| Acenaphthene             | <b>0.646</b> | 0.385        | 0.366        | 0.231  |
| Fluorene                 | <b>0.881</b> | 0.179        | 0.031        | 0.158  |
| Phenanthrene             | <b>0.728</b> | 0.306        | 0.280        | 0.090  |
| Anthracene               | <b>0.773</b> | -0.083       | 0.022        | 0.243  |
| Benzo(a)anthracene       | <b>0.937</b> | 0.211        | 0.026        | -0.015 |
| Chrysene                 | <b>0.872</b> | 0.381        | 0.068        | -0.140 |
| Benzo(b)fluoranthene     | <b>0.906</b> | 0.268        | -0.081       | -0.220 |
| Benzo(k)fluoranthene     | <b>0.809</b> | 0.142        | -0.013       | -0.176 |
| Benzo(a)pyrene           | <b>0.840</b> | 0.105        | -0.005       | -0.292 |
| Indeno(1,2,3, -cd)pyrene | <b>0.795</b> | 0.236        | -0.037       | -0.319 |
| Benzo(g, h, i)perylene   | <b>0.869</b> | 0.258        | -0.068       | -0.174 |
| SPAHs                    | <b>0.859</b> | 0.265        | 0.253        | 0.201  |
| PCB 101                  | 0.139        | 0.021        | <b>0.790</b> | 0.109  |
| PCB 138                  | 0.014        | -0.056       | <b>0.961</b> | 0.140  |
| PCB 153                  | 0.099        | -0.067       | <b>0.951</b> | 0.018  |
| PCB 180                  | -0.042       | -0.070       | <b>0.900</b> | 0.024  |
| S PCB                    | 0.027        | -0.070       | <b>0.982</b> | 0.053  |
| Expl.Var %               | 28.2         | 28.1         | 14.2         | 8.1    |

**Table S2.** Factor loadings

| Factor Loadings (Varimax normalized):Principal components (Marked loadings are significant) |         |         |              |         |
|---------------------------------------------------------------------------------------------|---------|---------|--------------|---------|
| Variable                                                                                    | Factor1 | Factor2 | Factor3      | Factor4 |
| Humidity                                                                                    | 0.056   | -0.013  | 0.294        | 0.198   |
| Loss on ignition                                                                            | 0.074   | 0.037   | 0.322        | 0.205   |
| N-tot                                                                                       | 0.085   | 0.035   | 0.088        | -0.294  |
| P-tot                                                                                       | 0.168   | 0.035   | 0.009        | -0.077  |
| Cr -lab.                                                                                    | 0.133   | 0.047   | 0.235        | -0.405  |
| Zn-lab.                                                                                     | -0.027  | -0.100  | <b>0.691</b> | 0.090   |
| Cu-lab.                                                                                     | 0.119   | -0.027  | <b>0.712</b> | -0.024  |
| Ni-lab.                                                                                     | 0.054   | 0.022   | <b>0.709</b> | -0.383  |
| Pb- lab.                                                                                    | -0.169  | -0.107  | <b>0.677</b> | -0.040  |

|                                 |              |               |              |              |
|---------------------------------|--------------|---------------|--------------|--------------|
| <b>As-tot</b>                   | -0.028       | -0.007        | 0.191        | -0.229       |
| <b>Cr-tot</b>                   | 0.058        | 0.054         | <b>0.711</b> | -0.166       |
| <b>Zn-tot</b>                   | -0.125       | 0.070         | 0.077        | -0.021       |
| <b>Cu-tot</b>                   | -0.019       | 0.015         | -0.002       | 0.058        |
| <b>Ni-tot</b>                   | 0.001        | 0.032         | 0.484        | 0.011        |
| <b>Pb-tot</b>                   | -0.167       | -0.109        | <b>0.639</b> | -0.177       |
| <b>Naphthalene</b>              | 0.013        | 0.067         | 0.207        | 0.191        |
| <b>Acenaphthylene</b>           | <b>0.655</b> | 0.037         | -0.128       | 0.057        |
| <b>Acenaphthene</b>             | 0.015        | -0.011        | 0.048        | <b>0.826</b> |
| <b>Fluorene</b>                 | 0.151        | 0.015         | 0.146        | <b>0.899</b> |
| <b>Phenanthrene</b>             | 0.433        | -0.013        | 0.184        | <b>0.747</b> |
| <b>Anthracene</b>               | 0.379        | 0.070         | -0.031       | <b>0.772</b> |
| <b>Benzo(a)anthracene</b>       | <b>0.895</b> | 0.049         | -0.033       | 0.213        |
| <b>Chrysene</b>                 | <b>0.920</b> | -0.028        | 0.018        | 0.134        |
| <b>Benzo(b)fluoranthene</b>     | <b>0.910</b> | 0.094         | 0.217        | 0.061        |
| <b>Benzo(k)fluoranthene</b>     | <b>0.678</b> | 0.041         | 0.245        | 0.031        |
| <b>Benzo(a)pyrene</b>           | <b>0.768</b> | 0.027         | -0.194       | -0.067       |
| <b>Indeno(1,2,3, -cd)pyrene</b> | <b>0.720</b> | -0.007        | 0.302        | -0.182       |
| <b>Benzo(g, h, i)perylene</b>   | 0.276        | 0.039         | <b>0.610</b> | 0.028        |
| <b>SPAHs</b>                    | <b>0.786</b> | 0.041         | 0.253        | 0.594        |
| <b>PCB 101</b>                  | -0.028       | <b>-0.713</b> | 0.059        | -0.028       |
| <b>PCB 138</b>                  | -0.063       | <b>-0.905</b> | 0.037        | 0.090        |
| <b>PCB 153</b>                  | -0.062       | <b>-0.938</b> | 0.047        | -0.065       |
| <b>PCB 180</b>                  | 0.008        | <b>-0.774</b> | -0.025       | -0.091       |
| <b>S PCB</b>                    | -0.048       | <b>-0.973</b> | 0.012        | -0.014       |
| <b>Expl.Var %</b>               | 25.8         | 18.3          | 11.1         | 10.1         |

**Table S3.** Decoded variables tables

| <b>Variables</b>        | <b>Code</b> |
|-------------------------|-------------|
| <b>Humidity</b>         | <b>V1</b>   |
| <b>Loss on ignition</b> | <b>V2</b>   |
| <b>N-tot</b>            | <b>V3</b>   |

|                                 |            |
|---------------------------------|------------|
| <b>P-tot</b>                    | <b>V4</b>  |
| <b>Cr -lab.</b>                 | <b>V5</b>  |
| <b>Zn-lab.</b>                  | <b>V6</b>  |
| <b>Cu-lab.</b>                  | <b>V7</b>  |
| <b>Ni-lab.</b>                  | <b>V8</b>  |
| <b>Pb- lab.</b>                 | <b>V9</b>  |
| <b>As-tot</b>                   | <b>V10</b> |
| <b>Cr-tot</b>                   | <b>V11</b> |
| <b>Zn-tot</b>                   | <b>V12</b> |
| <b>Cu-tot</b>                   | <b>V13</b> |
| <b>Ni-tot</b>                   | <b>V14</b> |
| <b>Pb-tot</b>                   | <b>V15</b> |
| <b>Naphthalene</b>              | <b>V16</b> |
| <b>Acenaphthylene</b>           | <b>V17</b> |
| <b>Acenaphthene</b>             | <b>V18</b> |
| <b>Fluorene</b>                 | <b>V19</b> |
| <b>Phenanthrene</b>             | <b>V20</b> |
| <b>Anthracene</b>               | <b>V21</b> |
| <b>Benzo(a)anthracene</b>       | <b>V22</b> |
| <b>Chrysene</b>                 | <b>V23</b> |
| <b>Benzo(b)fluoranthene</b>     | <b>V24</b> |
| <b>Benzo(k)fluoranthene</b>     | <b>V25</b> |
| <b>Benzo(a)pyrene</b>           | <b>V26</b> |
| <b>Indeno(1,2,3, -cd)pyrene</b> | <b>V27</b> |
| <b>Benzo(g, h, i)perylene</b>   | <b>V28</b> |
| <b>SPAHs</b>                    | <b>V29</b> |
| <b>PCB 101</b>                  | <b>V30</b> |
| <b>PCB 138</b>                  | <b>V31</b> |
| <b>PCB 153</b>                  | <b>V32</b> |
| <b>PCB 180</b>                  | <b>V33</b> |
| <b>S PCB</b>                    | <b>V34</b> |

| Descriptive Statistics (Spreadsheet1) |         |          |          |          |          |
|---------------------------------------|---------|----------|----------|----------|----------|
|                                       | Valid N | Mean     | Minimum  | Maximum  | Std.Dev. |
| <b>Humidity</b>                       | 174     | 17.7037  | 4.3800   | 27.000   | 3.7995   |
| <b>Loss on ignition</b>               | 174     | 0.3138   | 0.0400   | 1.770    | 0.1868   |
| <b>N-tot</b>                          | 174     | 791.9195 | 103.0000 | 2926.000 | 453.3002 |
| <b>P-tot</b>                          | 174     | 267.4551 | 144.9700 | 984.340  | 109.3148 |
| <b>Cr -lab.</b>                       | 174     | 0.7511   | 0.1250   | 4.383    | 0.4805   |
| <b>Zn-lab.</b>                        | 174     | 2.6744   | 0.7631   | 12.085   | 1.2883   |
| <b>Cu-lab.</b>                        | 174     | 0.4495   | 0.1250   | 5.596    | 0.5566   |
| <b>Ni-lab.</b>                        | 174     | 0.4336   | 0.1250   | 5.383    | 0.4745   |
| <b>Pb- lab.</b>                       | 174     | 1.8978   | 0.6517   | 5.503    | 0.6969   |
| <b>As-tot</b>                         | 174     | 0.9731   | 0.6250   | 5.050    | 0.6861   |
| <b>Cr-tot</b>                         | 174     | 2.6900   | 1.2400   | 19.540   | 1.7015   |
| <b>Zn-tot</b>                         | 174     | 8.7082   | 2.3710   | 59.330   | 6.4428   |
| <b>Cu-tot</b>                         | 174     | 0.9081   | 0.1250   | 45.000   | 3.4560   |
| <b>Ni-tot</b>                         | 174     | 1.4799   | 0.3808   | 11.820   | 1.2644   |
| <b>Pb-tot</b>                         | 174     | 2.5138   | 0.9624   | 7.404    | 0.8271   |
| <b>Naphthalene</b>                    | 174     | 0.0017   | 0.0005   | 0.053    | 0.0052   |
| <b>Acenaphthylene</b>                 | 174     | 0.0006   | 0.0005   | 0.002    | 0.0002   |
| <b>Acenaphthene</b>                   | 174     | 0.0009   | 0.0005   | 0.012    | 0.0010   |
| <b>Fluorene</b>                       | 174     | 0.0014   | 0.0005   | 0.007    | 0.0012   |
| <b>Phenanthrene</b>                   | 174     | 0.0028   | 0.0005   | 0.010    | 0.0019   |
| <b>Anthracene</b>                     | 174     | 0.0007   | 0.0005   | 0.006    | 0.0005   |
| <b>Benzo(a)anthracene</b>             | 174     | 0.0010   | 0.0005   | 0.006    | 0.0010   |
| <b>Chrysene</b>                       | 174     | 0.0011   | 0.0005   | 0.005    | 0.0009   |
| <b>Benzo(b)fluoranthene</b>           | 174     | 0.0020   | 0.0005   | 0.013    | 0.0020   |
| <b>Benzo(k)fluoranthene</b>           | 174     | 0.0007   | 0.0005   | 0.003    | 0.0004   |
| <b>Benzo(a)pyrene</b>                 | 174     | 0.0006   | 0.0005   | 0.003    | 0.0003   |
| <b>Indeno(1,2,3, -<br/>cd)pyrene</b>  | 174     | 0.0012   | 0.0005   | 0.009    | 0.0013   |
| <b>PCB 28</b>                         | 174     | 0.0009   | 0.0005   | 0.005    | 0.0008   |
| <b>PCB 52</b>                         | 174     | 0.0179   | 0.0005   | 0.086    | 0.0163   |
| <b>PCB 101</b>                        | 174     | 0.0001   | 0.0001   | 0.000    | 0.0000   |

|                |     |        |        |       |        |
|----------------|-----|--------|--------|-------|--------|
| <b>PCB 138</b> | 174 | 0.0002 | 0.0001 | 0.001 | 0.0002 |
| <b>PCB 153</b> | 174 | 0.0001 | 0.0001 | 0.001 | 0.0001 |
| <b>PCB 180</b> | 174 | 0.0002 | 0.0001 | 0.001 | 0.0002 |
| <b>S PCB</b>   | 174 | 0.0006 | 0.0001 | 0.004 | 0.0006 |

**Table S4.** Factor loadings for zone C

| Factor Loadings (Varimax normalized)) Extraction: Principal components (Marked loadings are significant |                |                |                |                |
|---------------------------------------------------------------------------------------------------------|----------------|----------------|----------------|----------------|
| <b>Variables</b>                                                                                        | <b>Factor1</b> | <b>Factor2</b> | <b>Factor3</b> | <b>Factor4</b> |
| <b>Humidity</b>                                                                                         | -0.228         | -0.185         | -0.078         | -0.019         |
| <b>Loss on ignition</b>                                                                                 | 0.102          | <b>0.720</b>   | 0.113          | 0.210          |
| <b>N-tot</b>                                                                                            | 0.177          | <b>0.797</b>   | 0.131          | -0.088         |
| <b>P-tot</b>                                                                                            | -0.026         | 0.047          | 0.423          | <b>-0.729</b>  |
| <b>Cr -lab.</b>                                                                                         | 0.014          | 0.473          | 0.020          | <b>-0.795</b>  |
| <b>Zn-lab.</b>                                                                                          | 0.186          | <b>0.745</b>   | 0.589          | 0.194          |
| <b>Cu-lab.</b>                                                                                          | 0.188          | 0.354          | <b>0.742</b>   | -0.009         |
| <b>Ni-lab.</b>                                                                                          | 0.168          | <b>0.724</b>   | 0.464          | -0.428         |
| <b>As-tot</b>                                                                                           | 0.123          | 0.231          | <b>0.698</b>   | 0.021          |
| <b>Pb- lab.</b>                                                                                         | 0.148          | 0.122          | <b>0.766</b>   | -0.127         |
| <b>Cr-tot</b>                                                                                           | 0.081          | 0.109          | <b>0.698</b>   | -0.070         |
| <b>Zn-tot</b>                                                                                           | 0.100          | -0.044         | <b>0.683</b>   | 0.450          |
| <b>Cu-tot</b>                                                                                           | -0.062         | 0.302          | 0.188          | <b>0.684</b>   |
| <b>Ni-tot</b>                                                                                           | -0.095         | 0.066          | 0.374          | <b>0.750</b>   |
| <b>Pb-tot</b>                                                                                           | 0.058          | 0.286          | <b>0.770</b>   | -0.221         |
| <b>Naphthalene</b>                                                                                      | 0.046          | -0.153         | <b>0.701</b>   | 0.250          |
| <b>Acenaphthylene</b>                                                                                   | <b>0.777</b>   | 0.060          | -0.139         | -0.297         |
| <b>Acenaphthene</b>                                                                                     | 0.241          | -0.180         | <b>0.701</b>   | 0.253          |
| <b>Fluorene</b>                                                                                         | 0.628          | -0.191         | <b>0.700</b>   | 0.137          |
| <b>Phenanthrene</b>                                                                                     | <b>0.715</b>   | -0.110         | 0.507          | 0.010          |
| <b>Anthracene</b>                                                                                       | 0.242          | <b>0.683</b>   | 0.178          | -0.033         |
| <b>Benzo(a)anthracene</b>                                                                               | <b>0.847</b>   | 0.092          | 0.335          | -0.234         |

|                                 |              |              |        |        |
|---------------------------------|--------------|--------------|--------|--------|
| <b>Chrysene</b>                 | <b>0.800</b> | 0.159        | 0.471  | 0.012  |
| <b>Benzo(b)fluoranthene</b>     | <b>0.736</b> | 0.206        | 0.511  | 0.165  |
| <b>Benzo(k)fluoranthene</b>     | <b>0.846</b> | 0.397        | 0.143  | -0.138 |
| <b>Benzo(a)pyrene</b>           | <b>0.781</b> | 0.179        | 0.351  | 0.309  |
| <b>Indeno(1,2,3, -cd)pyrene</b> | <b>0.686</b> | 0.399        | 0.396  | 0.175  |
| <b>Dibenzo(a, h)anthracene</b>  | <b>0.777</b> | 0.060        | -0.139 | -0.297 |
| <b>Benzo(g, h, i)perylene</b>   | <b>0.625</b> | -0.302       | 0.033  | 0.320  |
| <b>SPAHs</b>                    | <b>0.725</b> | 0.034        | 0.629  | 0.169  |
| <b>PCB 138</b>                  | <b>0.627</b> | 0.373        | -0.344 | 0.368  |
| <b>PCB 153</b>                  | 0.102        | 0.419        | 0.195  | -0.139 |
| <b>PCB 180</b>                  | <b>0.687</b> | 0.555        | -0.307 | -0.213 |
| <b>S PCB</b>                    | 0.466        | <b>0.742</b> | -0.226 | -0.028 |
| <b>Expl.Var %</b>               | 24.1         | 19.7         | 13.8   | 10.6   |
